# Supplementary material for: Alleviating Ultrafiltration Membrane Fouling Caused by Effluent Organic Matter Using Pre-Ozonation: A Perspective of EEM and Molecular Weight Distribution
Source: MDPI journal article supplement (doi:10.3390/membranes13040452), 2023-04-21
Supplement: s1 [file s1]

# Alleviating Ultrafiltration Membrane Fouling Caused by Effluent Organic Matter Using Pre-Ozonation: A Perspective of EEM and Molecular Weight Distribution

The photos of homemade laboratory experimental setup and membrane module were shown in Fig. S1.

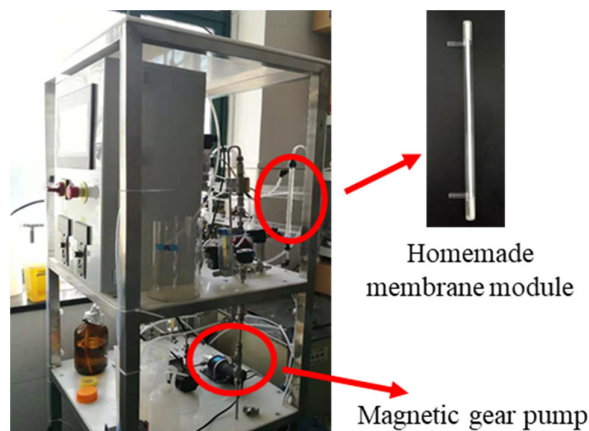

**Figure S1.** Photos of laboratory experimental setup and homemade membrane modules.

**Table S1.** Analysis of conventional water quality parameters.

| Parameters | pH   | DOC<br>(mg C/L) | COD<br>(mg O <sub>2</sub> / L) | UV <sub>254</sub><br>(cm <sup>-1</sup> ) |
|------------|------|-----------------|--------------------------------|------------------------------------------|
| Maximum    | 7.35 | 6.85            | 38.7                           | 0.168                                    |
| Minimum    | 6.76 | 4.92            | 31.2                           | 0.123                                    |
| Mean       | 7.02 | 5.42            | 35.2                           | 0.145                                    |

The identified components of PAFARAC were shown in Fig. S2. And the previous studies on description and wavelength positions of PARAFAC components can be found in Table S2.

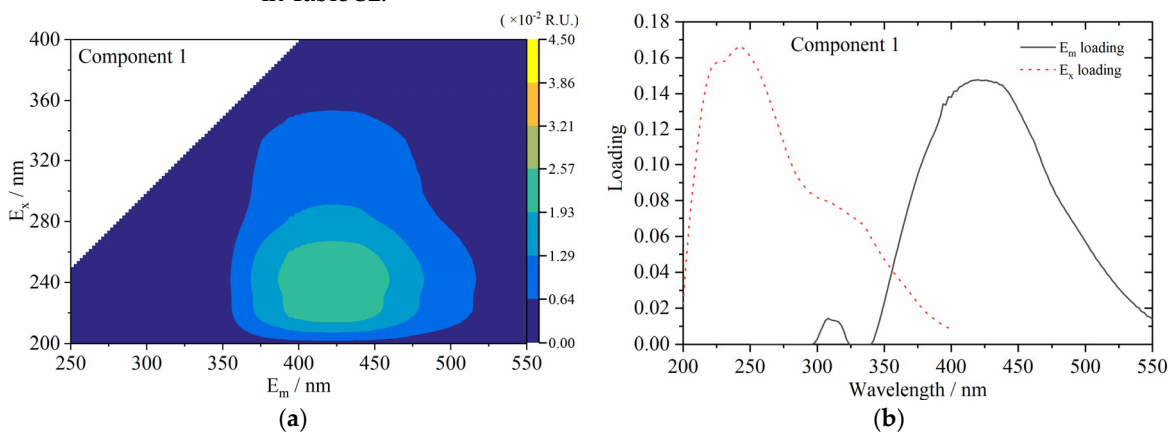

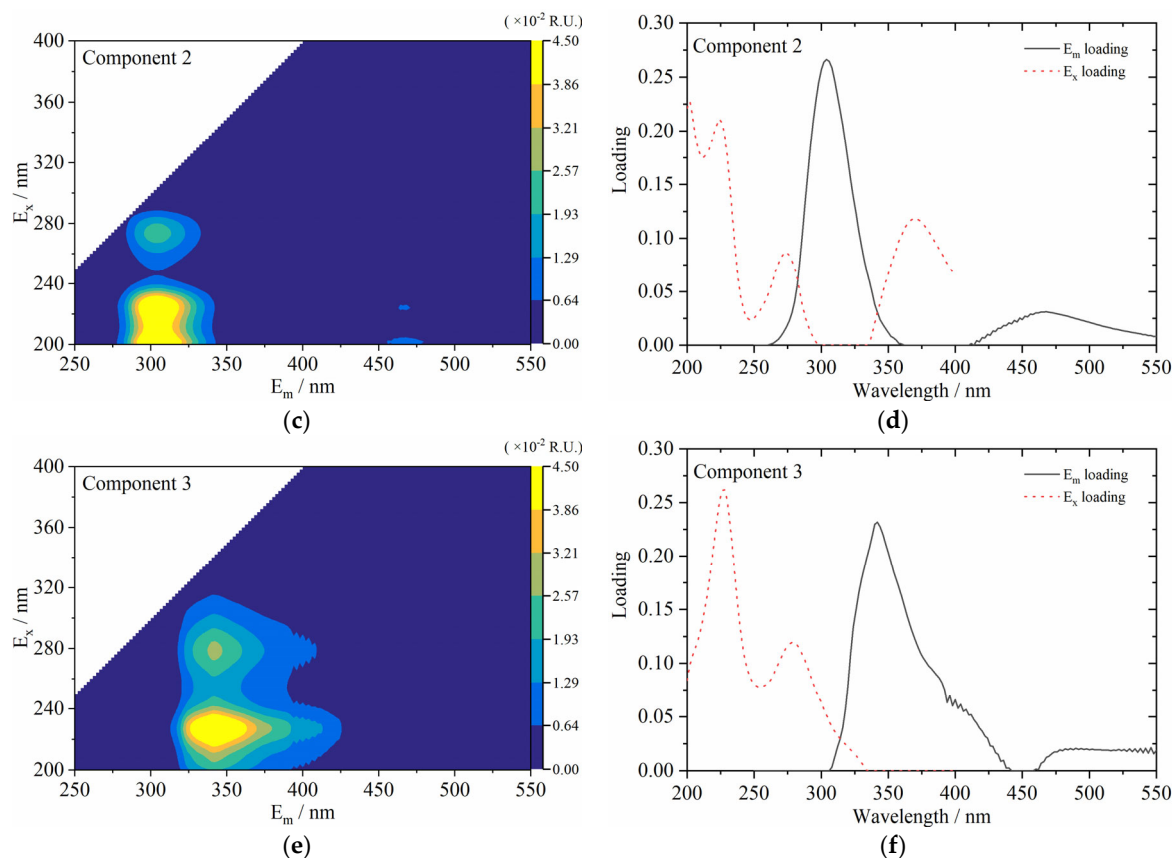

**Figure S2.** Contour plots of the three components identified from EEMs dataset. The right hand side plots show the split-half validations of excitation (red) and emission (black) loadings.

**Table S2.** Description and wavelength positions of PARAFAC components, and their comparisons with previously identified components.

| This Study            |                                            | Previous Studies                           |                                                |           |
|-----------------------|--------------------------------------------|--------------------------------------------|------------------------------------------------|-----------|
| Fluorescent component | Position (E <sub>x</sub> /E <sub>m</sub> ) | Position (E <sub>x</sub> /E <sub>m</sub> ) | Description                                    | Reference |
| Component 1           | 240/430                                    | <250/400                                   | Microbial humic-like fluorescence              | [1]       |
|                       |                                            | <240-260/374-450                           | Humic-like compounds                           | [2]       |
|                       |                                            | 270/304                                    | Protein, tyrosine-like                         | [1]       |
| Component 2           | 235, 275/300                               | 275/340                                    | tryptophan-like                                | [3]       |
|                       |                                            | 300/342                                    | Aromatic protein                               | [4]       |
|                       |                                            |                                            | Protein-like fluorescence, associated with     |           |
| Component 3           | 225, 280/340                               | 280/330                                    | microbial activity and biological productivity | [5]       |

## References

1. Murphy, K.R.; Hambly, A.; Singh, S.; Henderson, R.K.; Baker, A.; Stuetz, R.; Khan, S.J. Organic Matter Fluorescence in Municipal Water Recycling Schemes: Toward a Unified PARAFAC Model. *Environ. Sci. Technol.* **2011**, *45*, 2909–2916, <https://doi.org/10.1021/es103015e>.
2. Ishii, S.K.L.; Boyer, T.H. Behavior of Reoccurring PARAFAC Components in Fluorescent Dissolved Organic Matter in Natural and Engineered Systems: A Critical Review. *Environ. Sci. Technol.* **2012**, *46*, 2006–2017, <https://doi.org/10.1021/es2043504>.
3. A Stedmon, C.; Markager, S.; Bro, R. Tracing dissolved organic matter in aquatic environments using a new approach to fluorescence spectroscopy. *Mar. Chem.* **2003**, *82*, 239–254, [https://doi.org/10.1016/s0304-4203\(03\)00072-0](https://doi.org/10.1016/s0304-4203(03)00072-0).

4. Yamashita, Y.; Scinto, L.J.; Maie, N.; Jaffé, R. Dissolved Organic Matter Characteristics Across a Subtropical Wetland's Landscape: Application of Optical Properties in the Assessment of Environmental Dynamics. *Ecosystems* **2010**, *13*, 1006–1019, <https://doi.org/10.1007/s10021-010-9370-1>.
5. Seredyńska-Sobecka, B.; Stedmon, C.A.; Boe-Hansen, R.; Waul, C.K.; Arvin, E. Monitoring organic loading to swimming pools by fluorescence excitation–emission matrix with parallel factor analysis (PARAFAC). *Water Res.* **2011**, *45*, 2306–2314, <https://doi.org/10.1016/j.watres.2011.01.010>.
